# Supplementary material
Source: PubMed Central journal article supplement (PMC5807244)
Supplement: NIHMS895270-supplement-1.pdf [file NIHMS895270-supplement-1.pdf]

## Supplementary Table SI

### *Ex vivo* Panel

| Markers                  | Fluorophore      | Clone     | Manufacturer    | Function         | Staining |
|--------------------------|------------------|-----------|-----------------|------------------|----------|
| Viability marker         | Near Infra Red   |           | Invitrogen      | Exclusion        | Surface  |
| CD14                     | APC-Alexa750     | Tuk4      | Invitrogen      | Exclusion        | Surface  |
| CD19                     | APC-Alexa750     | SJ25-CI   | Invitrogen      | Exclusion        | Surface  |
| CD3                      | BV650            | OKT3      | BD Biosciences  | Lineage          | Surface  |
| CD4                      | Alexa 488        | OKT4      | BD Biosciences  | Lineage          | Surface  |
| CD45RA                   | PE-TEX Red       | 2H4       | Beckman Coulter | Memory           | Surface  |
| CD27                     | Alexa 700        | O323      | eBioscience     | Memory           | Surface  |
| CCR4                     | BV510            | L291H4    | Biologend       | Homing           | Surface  |
| CCR6                     | BV605            | G034E3    | Biologend       | Homing           | Surface  |
| CXCR3                    | PE-cy7           | 1C6/CXCR3 | BD Biosciences  | Homing           | Surface  |
| KLRG1                    | PerCP-eFluor 710 | 13F12F2   | eBioscience     | Activation       | Surface  |
| HLA-DR                   | eFluor 450       | L243      | eBioscience     | Activation       | Surface  |
| PD-1                     | BV711            | EH12.2H7  | Biologend       | Activation       | Surface  |
| MHC class II tetramer #1 | PE               |           | NIH             | Mtb-specific CD4 | Surface  |
| MHC class II tetramer #2 | APC              |           | NIH             | Mtb-specific CD4 | Surface  |

### Functional Panel

| Markers               | Fluorophore      | Clone     | Manufacturer   | Function         | Staining |
|-----------------------|------------------|-----------|----------------|------------------|----------|
| Viability marker      | Near Infra Red   |           | Invitrogen     | Exclusion        | Surface  |
| CD14                  | APC-Alexa750     | Tuk4      | Invitrogen     | Exclusion        | Surface  |
| CD19                  | APC-Alexa750     | SJ25-CI   | Invitrogen     | Exclusion        | Surface  |
| CD3                   | BV650            | OKT3      | BD Biosciences | Lineage          | ICS      |
| CD4                   | Alexa 488        | OKT4      | BD Biosciences | Lineage          | Surface  |
| CCR4                  | BV510            | L291H4    | Biologend      | Homing           | Surface  |
| CCR6                  | BV605            | G034E3    | Biologend      | Homing           | Surface  |
| CXCR3                 | PE-cy7           | 1C6/CXCR3 | BD Biosciences | Homing           | Surface  |
| KLRG1                 | PerCP-eFluor 710 | 13F12F2   | eBioscience    | Activation       | Surface  |
| HLA-DR                | PE               | L243      | BD Biosciences | Activation       | Surface  |
| PD-1                  | BV711            | EH12.2H7  | Biologend      | Activation       | Surface  |
| IFN- $\gamma$         | Alexa 700        | B27       | BD Biosciences | Cytokine         | ICS      |
| TNF- $\alpha$         | eFluor 450       | MAb11     | eBioscience    | Cytokine         | ICS      |
| IL-2                  | PE/Dazzle 594    | MQ1       | Biologend      | Cytokine         | ICS      |
| MHC class II tetramer | APC              |           | NIH            | Mtb-specific CD4 | Surface  |

**Supplementary Table SI:** Detailed list of antibodies used in the flow cytometry panels.

Supplemental Figure S1

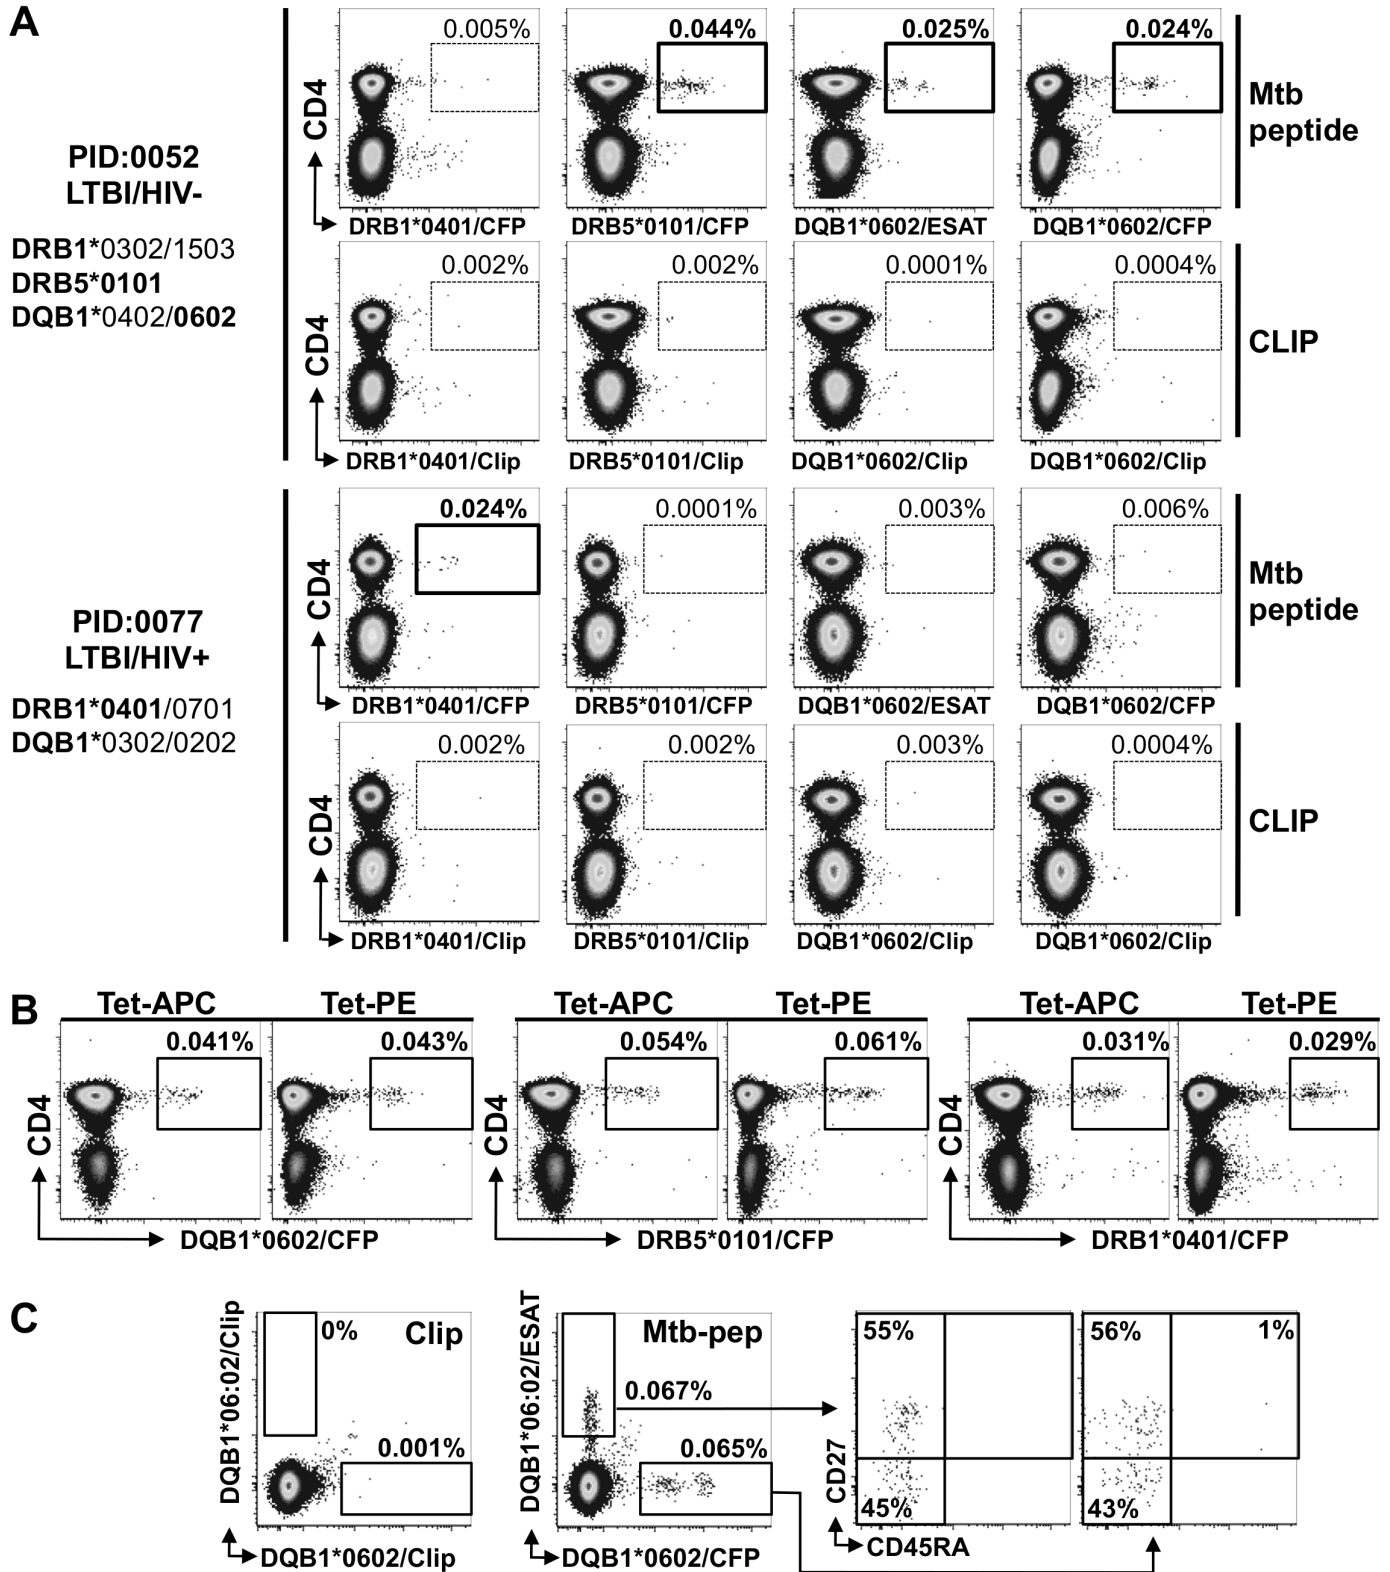

**Supplemental Figure S1: Validation of Mtb-specific MHC class II tetramer staining.** **A-** Example of the specificity of MHC class II tetramer labeling in two individuals. Tetramers loaded with the class II-associated invariant peptide (Clip, PVSKMRMATPLLMQA) were used as negative controls. **B-** Comparison of the performance of Mtb-specific MHC class II tetramers labeled with PE or APC. **C-** Example of dual MHC class II tetramer staining.

## Supplemental Figure S2

### A- Ex vivo phenotype

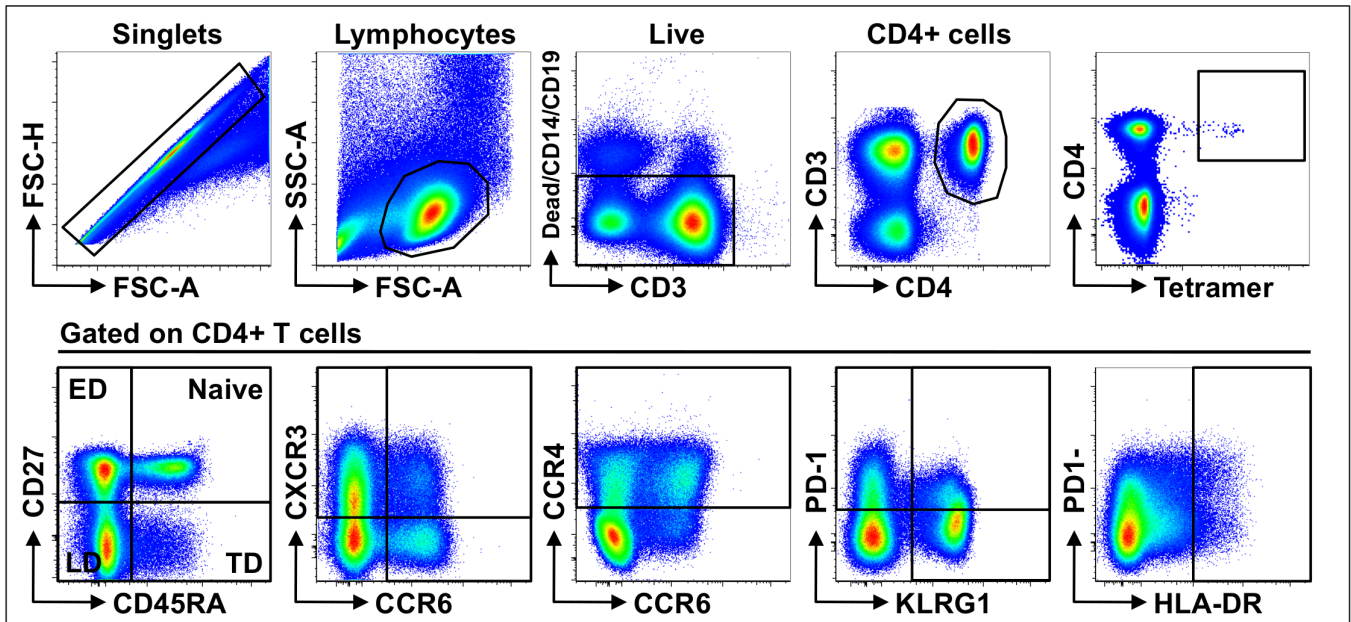

### B- Post-stimulation phenotype

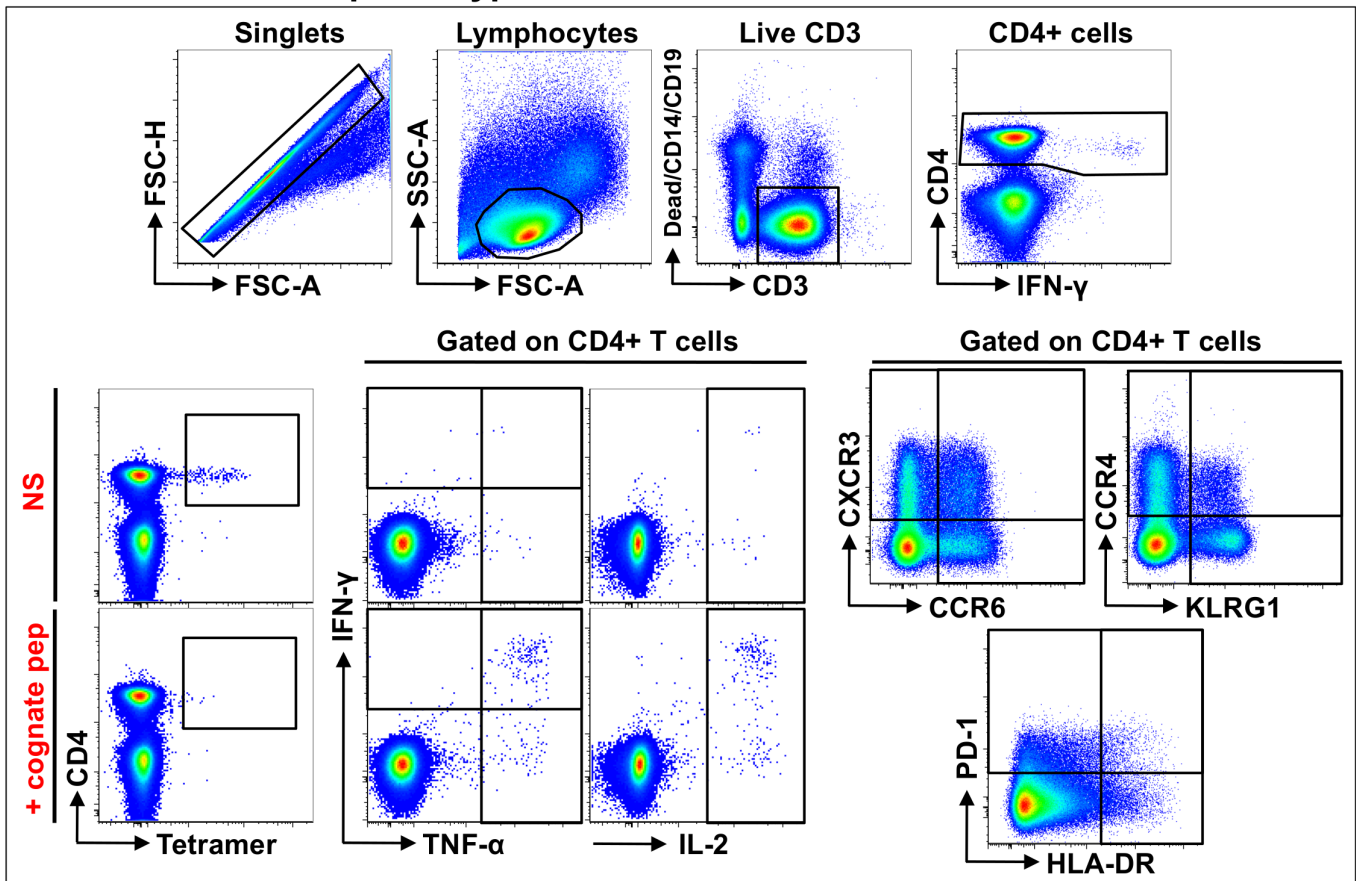

**Supplemental Figure S2: Gating strategies.** **A-** Gating strategy used to define the phenotype of ex vivo Mtb-specific MHC class II CD4+ T cells. **B-** Gating strategy used to define the functional profile and phenotype of Mtb-specific CD4+ T cells in response to cognate Mtb peptides.

## Supplemental Figure S3

**A**

| Groups       | No. of screened individuals | No. TET responders | % responders | No. TET+ responses |
|--------------|-----------------------------|--------------------|--------------|--------------------|
| LTBI/HIV-    | 28                          | 13                 | 46.4         | 19                 |
| LTBI/HIV+    | 30                          | 11                 | 36.7         | 19                 |
| aTB/HIV-     | 14                          | 6                  | 42.8         | 11                 |
| aTB/HIV+     | 14                          | 5                  | 35.7         | 10                 |
| <b>Total</b> | <b>86</b>                   | <b>34</b>          | <b>40.0</b>  | <b>59</b>          |

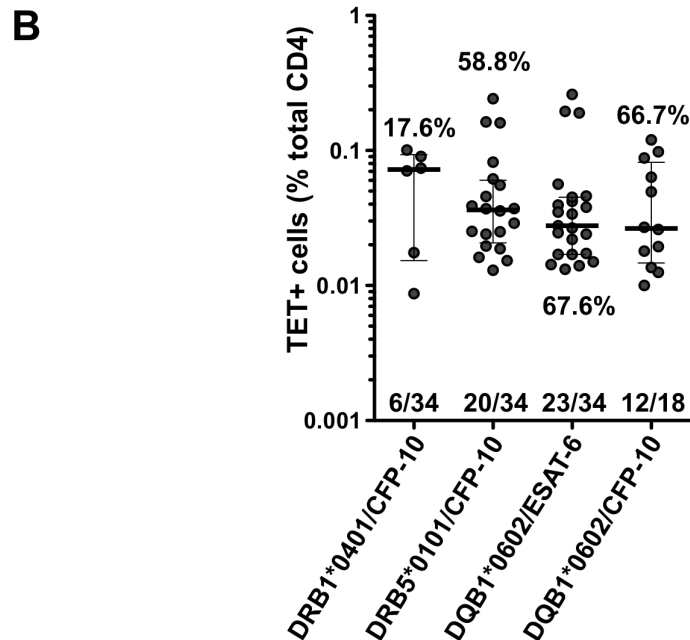

**Supplemental Figure S3: Identification and frequencies of Mtb-specific MHC class II tetramer (TET) responders and responses.** **A-** Summary table of the number of individuals screened, number of Mtb-specific MHC class II tetramer responders and number of tetramer responses identified in each clinical group. **B-** Comparison of the magnitude of each tested Mtb-specific MHC class II tetramer (DRB1\*0401/CFP-10, DRB5\*0101/CFP-10 and DQB1\*0602/ESAT-6 or CFP-10). The number on the x-axis represents the no. of TET+ responses / no. TET+ responders identified.
